# Supplementary material
Source: Elsevier journal article supplement (https://www.sciencedirect.com/science/article/pii/S0214460320300668)
Supplement: mmc1 [file S0214460320300668:mmc1.doc]

**APÉNDICE A**

***ADAPTACIÓN “THE PRAGMATICS PROFILE”***

*Fecha de nacimiento del Niño/a:…………………………….*

*Persona rellenando el cuestionario: □Padre □ Madre □ otro*

*Nombre del niño/a: ………………………………………………………….*

*Lea con calma cada pregunta y marque lo que hace su hijo/a con más frecuencia, pueden ser más de una opción, si ninguna define lo que hace su hijo/a escriba en otros la respuesta del niño/a en la situación planteada.*

| Item | puntuación |
| --- | --- |
| 1- ¿Qué hace su hijo/a normalmente para conseguir su atención? |  |
| Llora. Tira de ti | 0 |
| Vocalizaciones | 1 |
| Llamar (por ejemplo, “mama”) | 2 |
| Usa palabras como “mira”… | 3 |
| Otros: |  |
| 2-Si usted y el niño/a van por la calle o andando por un parque, y él ve algo interesante, ¿qué suele hacer el niño/a? |  |
| Se para y vocaliza | 0 |
| Se para, se vuelve y mira para usted | 1 |
| Decir una palabra, por ejemplo, “mira”, “avión” | 2 |
| Empieza a hablar de lo que vio | 3 |
| Otros: |  |
| 3-Si usted está en la cocina y su hijo/a quiere comer algo que no alcanza, cómo se lo hace saber, ¿cómo se lo pide? |  |
| Llorando | 0 |
| Señalando | 1 |
| Haciendo sonidos y señalando. Estirándose hacia el objeto o llevando su mano a esta. Mirando, señalando y haciendo sonidos | 2 |
| Señalando y diciendo “ quiero eso” o similar | 3 |
| Otros |  |
| 4-¿Cómo te hace saber el niño/a que quiere que lo cojas? |  |
| Mira hacia ti | 0 |
| Pone las manos hacia ti | 1 |
| Dice “arriba”, “lleva” | 2 |
| Dice “estoy cansado”, “Me duelen las piernas” o similar | 3 |
| Otros |  |
| 5- Si el niño/a necesita vuestra ayuda, por ejemplo, si se atascó en un juguete sobre ruedas, o necesita soltarse el cinturón para salir del cochecito. ¿Qué suele hacer? |  |
| Grita | 0 |
| Hace ruidos que todavía no son palabras | 1 |
| Te pide | 2 |
| Dice algo tipo “enganchado o “ no puedo” | 3 |
| Otros |  |
| 6- Si está acunando al niño/a arriba y abajo en su regazo, y él quiere que siga y que lo haga otra vez, ¿cómo se lo pide? |  |
| Sonríe y te mira | 0 |
| Intenta hacer él el movimiento | 1 |
| Hace ruidos | 2 |
| Dice “más” u “otra vez” | 3 |
| Otros |  |
| 7- Si el niño/a nota algo nuevo en la casa, ¿qué hace para preguntar sobre ello? |  |
| No dice nada | 0 |
| Señala lo nuevo y te mira | 1 |
| Pregunta ¿Qué? , ¿Para qué? ¿Qué es? ¿Eso? | 2 |
| Cuando respondes, continúa preguntando, ¿por qué? o queriendo saber más | 3 |
| Otros |  |
| 8- Si tú le estás dando alguna comida que tu hijo/a no quiere, ¿qué es probable que haga? |  |
| Grita | 0 |
| Gira la cara o aparta la comida con la mano | 1 |
| Dice algo como “no me gusta” o “no quiero” | 2 |
| Pide algo diferente, otra comida | 3 |
| Otro |  |
| 9- Si una persona familiar viene a vuestra casa, ¿qué hace el niño/a normalmente? ¿Cómo reacciona? |  |
| No hace ningún caso | 0 |
| Mira a la cara de la persona que entra | 1 |
| Sonríe y hace un sonido para saludar o gesto con las manos para saludar | 2 |
| Dice el nombre de la persona o dice una palabra de saludo como “Hola!” | 3 |
| Otros |  |
| 10-¿Qué hace el niño/a/ cuando alguien se marcha? |  |
| No muestra ninguna reacción | 0 |
| Dice adiós con la mano imitando lo que nosotros hacemos | 1 |
| Dice adiós con la mano espontáneamente | 2 |
| Dice “adiós-adiós” o “adiós-adiós (con la palabra)” | 3 |
| Otros |  |
| 11- Si el niño/a está disfrutando con algo, ¿qué hace para que lo sepamos, cómo lo muestra? |  |
| No muestra ninguna reacción | 0 |
| Sonríe, aplaude | 1 |
| Pide para hacerlo otra vez. | 2 |
| Dice “me gusta”, “es divertido”', o algo similar | 3 |
| Otros |  |
| 12- Si el niño/a se ha hecho daño, ¿qué hace para que usted lo sepa? |  |
| Nada | 0 |
| Llorar | 1 |
| Se acerca para que lo consuele | 2 |
| Te cuenta lo que pasó con palabras | 3 |
| Otros |  |
| 13- Si estás intentando ayudar al niño/a a algo como vestirse y él quiere hacerlo solo, ¿cómo se lo hace saber? |  |
| Grita o se enfada | 0 |
| Prueba para hacerlo | 1 |
| Dice “a mí”, “su nombre” o algo similar. | 2 |
| Dice “yo solo” | 3 |
| Otros: |  |
| 14- Cuando el niño/a identifica algo que él reconoce, ¿cómo hace para nombrarlo? |  |
| Intenta vocalizarlo. Hace un gesto o hace un sonido relacionado (“miau” para gato, “broom” para coche) | 0 |
| Utilizar su palabra propia | 1 |
| Dice la palabra correcta | 2 |
| Dice una frase (por ejemplo:“Aquello es un ….”) | 3 |
| Otros |  |
| 15- Si estás guardando cosas y el niño/a ve algo que le interesa, ¿qué tipo de comentario puede hacer? |  |
| Lo coge | 0 |
| Lo nombra | 1 |
| Dice a quién le pertenece, por ejemplo, “madrina” | 2 |
| Dice algo aproximadamente sobre las cualidades del objeto (por ejemplo, “roto”, “grande”….) | 3 |
| Otros |  |
| 16- Si el niño/a se da cuenta de que algo no está donde lo esperaría, ¿qué clase de comentario haría? |  |
| Ninguno no lo nota. | 0 |
| Dice el nombre de objeto. | 1 |
| Dice “no está” o similar | 2 |
| Dice algo como “¿Dónde está el oso?”,“¿Marchó?” | 3 |
| Otros |  |
| 17- Si algo pasa mientras tú no estás con el niño/a. Algo se rompe, o alguien se hace daño. ¿Cómo te lo hace saber a tu vuelta? |  |
| No | 0 |
| Sí, viene junto a mí llorando | 1 |
| Sí, Te señala, por ejemplo, un moratón o un juguete roto. | 2 |
| Sí, te lo dice, pero cuesta entenderlo. | 3 |
| Si, Te lo dice claramente |  |
| Otros: |  |
| 18- Si quieres conseguir que el niño/a te atienda, ¿qué sueles hacer? |  |
| Le agarro | 0 |
| Te acercas mucho a su cara. | 1 |
| Le tocas | 2 |
| Le llamas por su nombre y ya te atiende | 3 |
| Otros |  |
| 19- Si está sentado cerca del niño/a hablándole, ¿qué hace generalmente para responderle? |  |
| Muestra poco interés. | 0 |
| Te mira a los ojos. | 1 |
| Movimientos con su cuerpo y cara que parecen gestos comunicativos. | 2 |
| Sigue la “conversación” utilizando sonidos o palabras | 3 |
| Otros |  |
| 20- Si usted señala algo que quiere que el niño/a mire ¿normalmente qué hace él? |  |
| No responde | 0 |
| Te mira a ti, no a dónde estás señalando. | 1 |
| Te mira a ti y al objeto si éste está cerca. | 2 |
| Mira lo que tú señalas incluso aunque esté lejos. | 3 |
| Otros: |  |
| 21- Cuando le está hablando, ¿cómo sabe que se da cuenta de que le está hablando a él? |  |
| No se da cuenta | 0 |
| Mira a vuestra cara. | 1 |
| Sonríe y te mira. | 2 |
| Responde con gestos o sonidos | 3 |
| Otros |  |
| 22- Si da una instrucción como “ve y coge los zapatos”, ¿cómo responde? |  |
| No muestra ninguna reacción | 0 |
| Te mira pero no parece saber qué hacer. | 1 |
| Va buscar algo pero no regresa. | 2 |
| Lleva a cabo vuestra petición | 3 |
| Otros |  |
| 23. Si preguntas, por ejemplo, ¿qué tienes ahí?, ¿quién te dio ese chocolate?, ¿qué hace normalmente el niño para responder? |  |
| No responde | 0 |
| Hace gestos o te muestra el objeto | 1 |
| Dice palabras sueltas por ejemplo, “chocolate” | 2 |
| Dice dos palabras o más: por ejemplo: “mi pintura”, “no sabe” | 3 |
| Otros |  |
| 24. ¿Que hace el niño para reaccionar a dinámicas de su interés, como juegos de manos, canciones, juegos de pilla, pilla, etc.? |  |
| No realiza ninguna respuesta | 0 |
| Nos mira y espera | 1 |
| Dice algún sonido o palabra del juego | 2 |
| Alerta si haces algo mal o diferente | 3 |
| Otros |  |
| 25¿Qué clase de cosas hacen reír al niño/a? |  |
| No suele reír | 0 |
| Los juegos de cosquillas | 1 |
| Esconder algo, balancearlo en el aire, o perseguirlo. | 2 |
| Pequeñas bromas, rimas graciosas, chistes, o palabras groseras. | 3 |
| Otros |  |
| 26- Si tiene que decirle “no”, ¿qué hace tu hijo/a normalmente, cómo responde? |  |
| Tiene un berrinche. | 0 |
| Lo acepta. | 1 |
| Continúa insistiendo. | 2 |
| Busca una alternativa, ¿Mañana entonces? | 3 |
| Otros |  |
| 27- Si usted dice “en un minuto te lo doy”, ¿qué hace el niño/a, cómo responde? |  |
| No entiende y mantiene lo que estaba haciendo. | 0 |
| Te mira pero no comprende. | 1 |
| Espera, entiende que si se lo vas a dar | 2 |
| Espera y pregunta otra vez después de un rato, entendiendo que ya pasó el tiempo | 3 |
| No entiende y mantiene lo que estaba haciendo. |  |
| 28- Cuándo usted y su hijo/a están jugando o interaccionando juntos, ¿qué hace, cómo participa? |  |
| Muestra interés. | 0 |
| Sonríe y muestra interés. Vocaliza diferentes sonidos | 1 |
| Señala, muestra, hace gestos o usa palabras y frases sencillas | 2 |
| Mantiene conversaciones con el otro | 3 |
| 29-Si el niño/a quiere iniciar una conversación o un juego con usted ¿cómo lo hace? |  |
| Se acerca a vosotros. | 0 |
| Hace sonidos, balbuceos. | 1 |
| Se acerca a ti y mira tu cara esperando...Te da o te muestra algo | 2 |
| Habla contigo directamente | 3 |
| Otros |  |
| 30- Cuándo una conversación o un juego empieza, ¿cómo la mantiene? |  |
| No mantiene una conversación | 0 |
| Rápido pierde interés. | 1 |
| Lo tienes que dirigir con preguntas sencillas | 2 |
| Toma la iniciativa | 3 |
| Otros |  |
| 31-Cuándo una conversación entre su hijo/a y usted no consigue ser fluida ¿cuál suele ser habitualmente la razón? |  |
| No mantiene conversaciones nunca | 0 |
| Tiene dificultades en comprender las frases o gestos que hago | 1 |
| No consigue explicar o concretar algo ni con palabra ni con gesto | 2 |
| Yo no le entiendo y él prefiere dejar de intentarlo. | 3 |
| Otros: |  |
| 32- Si el niño/a está intentando decirle algo y usted no ha entendido ¿Qué suele hacer él? |  |
| Nada | 0 |
| Parece enfadado y deja la conversación | 1 |
| Repite lo mismo para que entiendas | 2 |
| Prueba a buscar otra manera de decírtelo | 3 |
| Otros |  |
| 33-Si el niño/a, no entiende algo que usted ha dicho, ¿cómo lo indica? |  |
| Nada | 0 |
| Te mira desconcertado | 1 |
| Repite lo que tú dijiste. | 2 |
| Pide aclaración (por ejemplo,”¿Qué? ¿Qué dices? ¿Qué es eso?” | 3 |
| Otros |  |
| 34-¿Cómo termina una conversación entre usted y el niño/a? |  |
| Nada | 0 |
| Mira a otro lado | 1 |
| Se va | 2 |
| Cambia de tema o dice que no quiere hablar más | 3 |
| Otros |  |
| 35-¿Cómo reacciona a las conversaciones que escucha? |  |
| No presta ninguna atención | 0 |
| Reacciona solo si dicen su nombre | 1 |
| Reacciona a palabras de su interés (por ejemplo, “helado” o “piscina”). | 2 |
| Pregunta qué dicen o prueba a hablar el también | 3 |
| Otros |  |

*Cada item presenta cuatro posibles respuestas y una casilla de “otros” que se recodificará en la respuesta más similar en cuanto a logro. Las cuatro posibles respuestas se puntúan de 0 a 3 siendo cero la puntuación más baja y 3 la puntuación más alta en el orden de aparición de las respuestas
